# Supplementary material for: MiR-221-3p improves the prognostic value of lung ultrasound score in acute respiratory distress syndrome and modulates the inflammatory response
Source: publisher site journal article supplement (doi:10.1515/tjb-2025-0157), 2025-08-18
Supplement: Supplementary file 2 [file j_tjb-2025-0157_suppl_001.docx]

**Table S1.** Primers used in RT-qPCR experiments.

| Name | Sequence (5'-3') |
| --- | --- |
| miR-221-3p | Forward: CGCGAGCTACATTGTCTGCTG |
| Reverse: AGTGCAGGGTCCGAGGTATT |
| U6 | Forward: CTCGCTTCGGCAGCACA |
| Reverse: AACGCTTCACGAATTTGCGT |
